# Supplementary material
Source: HighWire-hosted journal article supplement (https://www.annals.org/content/suppl/2007/02/01/146.3.211)
Supplement: Segal_A1_146-3-211-DC1-A1.pdf [file Segal_A1_146-3-211-DC1-A1.pdf]

*Appendix Table 1. Individual Studies Included in Systematic Reviews\**

| Study, Year                               | Green et al., 1994 (15) | Hirsh et al., 1995 (17) | Lensing et al., 1995 (21) | Leizorovicz, 1996 (20) | Howard, 1997 (18) | Brewer, 1998 (11) | Hettiarachchi et al., 1998 (16) | Hunt, 1998 (19) | Martineau and Tawil, 1998 (22) | Gould et al., 1999 (14) | Dolovich et al., 2000 (28) | Rocha et al., 2000 (25) | van Den Belt et al., 2000 (26) | van der Heijden et al., 2000 (27) | Raschke et al., 2003 (24) | Quinlan et al., 2004 (23) | Mismetti et al., 2005 (12) |
|-------------------------------------------|-------------------------|-------------------------|---------------------------|------------------------|-------------------|-------------------|---------------------------------|-----------------|--------------------------------|-------------------------|----------------------------|-------------------------|--------------------------------|-----------------------------------|---------------------------|---------------------------|----------------------------|
| Levine, 1991                              | x                       |                         |                           |                        |                   |                   |                                 | x               |                                |                         |                            |                         |                                |                                   |                           |                           |                            |
| Lassen, 1991                              | x                       |                         |                           |                        |                   |                   |                                 | x               |                                |                         |                            |                         |                                |                                   |                           |                           |                            |
| Turpie, 1986                              | x                       |                         |                           |                        |                   |                   |                                 | x               |                                |                         |                            |                         |                                |                                   |                           |                           |                            |
| Hull, 1993                                | x                       |                         |                           |                        |                   |                   |                                 | x               |                                |                         |                            |                         |                                |                                   |                           |                           |                            |
| Leyvraz, 1991                             | x                       |                         |                           |                        |                   |                   |                                 |                 |                                |                         |                            |                         |                                |                                   |                           |                           |                            |
| Spiro, 1991                               | x                       |                         |                           |                        |                   |                   |                                 |                 |                                |                         |                            |                         |                                |                                   |                           |                           |                            |
| Danish Enoxaparin Study Group, 1991       | x                       |                         |                           |                        |                   |                   |                                 |                 |                                |                         |                            |                         |                                |                                   |                           |                           |                            |
| Eriksson, 1991                            | x                       |                         |                           |                        |                   |                   |                                 |                 |                                |                         |                            |                         |                                |                                   |                           |                           |                            |
| Leyvraz, 1992                             | x                       |                         |                           |                        |                   |                   |                                 |                 |                                |                         |                            |                         |                                |                                   |                           |                           |                            |
| German Hip Arthroplasty Trial Group, 1992 | x                       |                         |                           |                        |                   |                   |                                 |                 |                                |                         |                            |                         |                                |                                   |                           |                           |                            |
| Planes, 1989                              | x                       |                         |                           |                        |                   |                   |                                 |                 |                                |                         |                            |                         |                                |                                   |                           |                           |                            |
| Hoek, 1989                                | x                       |                         |                           |                        |                   |                   |                                 |                 |                                |                         |                            |                         |                                |                                   |                           |                           |                            |
| Dechavanne, 1989                          | x                       |                         |                           |                        |                   |                   |                                 |                 |                                |                         |                            |                         |                                |                                   |                           |                           |                            |
| RD Heparin Arthroplasty Group (in review) | x                       |                         |                           |                        |                   |                   |                                 |                 |                                |                         |                            |                         |                                |                                   |                           |                           |                            |
| Simmoneau et al., 1993                    |                         | x                       | x                         | x                      |                   |                   | x                               | x               | x                              | x                       | x                          | x                       | x                              | x                                 | x                         |                           |                            |
| Hull et al., 1992                         |                         | x                       | x                         | x                      |                   |                   | x                               | x               | x                              | x                       | x                          | x                       | x                              | x                                 | x                         | x                         |                            |
| Prandoni, 1992                            |                         | x                       | x                         | x                      |                   |                   | x                               | x               | x                              | x                       | x                          | x                       | x                              | x                                 | x                         | x                         |                            |
| Lopaciuk, 1992                            |                         | x                       | x                         | x                      |                   |                   | x                               | x               | x                              | x                       | x                          | x                       | x                              | x                                 |                           |                           |                            |
| Bratt, 1990                               |                         | x                       | x                         | x                      |                   |                   |                                 | x               |                                | x                       | x                          |                         |                                |                                   |                           |                           |                            |
| Holm, 1986                                |                         | x                       | x                         | x                      |                   |                   |                                 | x               |                                |                         |                            | x                       |                                |                                   |                           |                           |                            |
| Bratt, 1985                               |                         | x                       | x                         | x                      |                   |                   |                                 |                 |                                |                         |                            | x                       |                                |                                   |                           |                           |                            |
| Lindmarker, 1994                          |                         | x                       | x                         |                        |                   |                   | x                               | x               | x                              | x                       | x                          | x                       | x                              | x                                 | x                         |                           |                            |
| Duroux, 1991                              |                         | x                       | x                         |                        |                   |                   | x                               |                 | x                              | x                       | x                          | x                       |                                | x                                 |                           |                           |                            |
| Faivre, 1988                              |                         | x                       |                           | x                      |                   |                   | x                               |                 |                                |                         |                            | x                       | x                              | x                                 |                           |                           |                            |
| Albada, 1989                              |                         | x                       |                           | x                      |                   |                   |                                 | x               |                                |                         |                            | x                       |                                |                                   |                           |                           |                            |
| Thery, 1992                               |                         | x                       |                           |                        |                   |                   |                                 | x               |                                |                         |                            |                         |                                |                                   |                           | x                         |                            |
| Handeland, 1990                           |                         | x                       |                           |                        |                   |                   |                                 |                 |                                |                         |                            |                         |                                |                                   |                           |                           |                            |
| Faivre, 1987                              |                         |                         | x                         |                        |                   |                   |                                 |                 |                                |                         |                            |                         |                                |                                   |                           |                           |                            |
| Levine, 1996                              |                         |                         |                           | x                      |                   | x                 | x                               | x               | x                              | x                       | x                          | x                       | x                              | x                                 | x                         |                           | x                          |
| Koopman, 1996                             |                         |                         |                           | x                      |                   | x                 | x                               | x               | x                              | x                       | x                          | x                       | x                              | x                                 | x                         |                           |                            |
| European Multicenter Study, 1991          |                         |                         |                           | x                      |                   |                   |                                 | x               |                                |                         | x                          |                         |                                |                                   | x                         | x                         |                            |
| Notarbartolo, 1988                        |                         |                         |                           | x                      |                   |                   |                                 |                 |                                |                         |                            | x                       |                                |                                   |                           |                           |                            |
| Harenberg, 1990                           |                         |                         |                           | x                      |                   |                   |                                 |                 |                                |                         |                            | x                       |                                |                                   |                           |                           |                            |
| Tedoldi, 1993                             |                         |                         |                           | x                      |                   |                   |                                 |                 |                                |                         |                            | x                       |                                |                                   |                           |                           |                            |
| Etude Multicentrique Francaise, 1989      |                         |                         |                           | x                      |                   |                   |                                 |                 |                                |                         |                            | x                       |                                |                                   |                           |                           |                            |
| Znaghi, 1988                              |                         |                         |                           | x                      |                   |                   |                                 |                 |                                |                         |                            |                         |                                |                                   |                           |                           |                            |
| Lindmarker, 1993                          |                         |                         |                           | x                      |                   |                   |                                 |                 |                                |                         |                            |                         |                                |                                   |                           |                           |                            |
| Loumanmaki, 1994                          |                         |                         |                           | x                      |                   |                   |                                 |                 |                                |                         |                            |                         |                                |                                   |                           |                           |                            |
| Fiessinger, 1994                          |                         |                         |                           | x                      |                   |                   |                                 |                 |                                |                         |                            |                         |                                |                                   |                           |                           |                            |
| Kakkar, 1993                              |                         |                         |                           |                        | x                 |                   |                                 | x               |                                |                         |                            |                         |                                |                                   |                           |                           |                            |
| Caen, 1988                                |                         |                         |                           |                        | x                 |                   |                                 |                 |                                |                         |                            |                         |                                |                                   |                           |                           |                            |
| Kakkar, 1986                              |                         |                         |                           |                        |                   |                   |                                 |                 |                                |                         |                            |                         |                                |                                   |                           |                           |                            |
| Hartl, 1990                               |                         |                         |                           |                        | x                 |                   |                                 |                 |                                |                         |                            |                         |                                |                                   |                           |                           |                            |
| Bergqvist et al., 1986                    |                         |                         |                           |                        | x                 |                   |                                 |                 |                                |                         |                            |                         |                                |                                   |                           |                           |                            |

*Continued on following page*



*Appendix Table 1—Continued*

| Study, Year      | Green et al., 1994 (15) | Hirsh et al., 1995 (17) | Lensing et al., 1995 (21) | Leizorovicz, 1996 (20) | Howard, 1997 (18) | Brewer, 1998 (11) | Hettiarachchi et al., 1998 (16) | Hunt, 1998 (19) | Martineau and Tawil, 1998 (22) | Gould et al., 1999 (14) | Dolovich et al., 2000 (28) | Rocha et al., 2000 (25) | van Den Belt et al., 2000 (26) | van der Heijden et al., 2000 (27) | Raschke et al., 2003 (24) | Quinlan et al., 2004 (23) | Mismetti et al., 2005 (12) |
|------------------|-------------------------|-------------------------|---------------------------|------------------------|-------------------|-------------------|---------------------------------|-----------------|--------------------------------|-------------------------|----------------------------|-------------------------|--------------------------------|-----------------------------------|---------------------------|---------------------------|----------------------------|
| Cohen, 1997      |                         |                         |                           |                        |                   |                   |                                 | x               |                                |                         |                            |                         |                                |                                   |                           |                           |                            |
| Heilmann, 1989   |                         |                         |                           |                        |                   |                   |                                 |                 | x                              |                         |                            |                         |                                |                                   |                           |                           |                            |
| Prandoni, 1990   |                         |                         |                           |                        |                   |                   |                                 |                 |                                |                         | x                          |                         |                                |                                   |                           |                           |                            |
| Harenberg, 2000  |                         |                         |                           |                        |                   |                   |                                 |                 |                                |                         |                            |                         | x                              | x                                 | x                         |                           |                            |
| Merli, 2001      |                         |                         |                           |                        |                   |                   |                                 |                 |                                |                         |                            |                         | x                              | x                                 | x                         | x                         | x                          |
| Breddin, 2001    |                         |                         |                           |                        |                   |                   |                                 |                 |                                |                         |                            |                         | x                              |                                   | x                         |                           |                            |
| Belcaro, 1999    |                         |                         |                           |                        |                   |                   |                                 |                 |                                |                         |                            |                         | x                              |                                   | x                         |                           |                            |
| Kirchmaier, 1998 |                         |                         |                           |                        |                   |                   |                                 |                 |                                |                         |                            |                         | x                              |                                   |                           | x                         |                            |
| Riess, 2003      |                         |                         |                           |                        |                   |                   |                                 |                 |                                |                         |                            |                         | x                              |                                   |                           |                           |                            |
| Findik, 2002     |                         |                         |                           |                        |                   |                   |                                 |                 |                                |                         |                            |                         | x                              |                                   |                           |                           |                            |
| Goldhaber, 1998  |                         |                         |                           |                        |                   |                   |                                 |                 |                                |                         |                            |                         | x                              |                                   |                           |                           |                            |
| Ninet, 1991      |                         |                         |                           |                        |                   |                   |                                 |                 |                                |                         |                            |                         | x                              |                                   |                           |                           |                            |
| Breddin, 1999    |                         |                         |                           |                        |                   |                   |                                 |                 |                                |                         |                            |                         |                                | x                                 |                           |                           |                            |
| Campbell, 1998   |                         |                         |                           |                        |                   |                   |                                 |                 |                                |                         |                            |                         |                                |                                   |                           | x                         |                            |
| Kuijjer, 1995    |                         |                         |                           |                        |                   |                   |                                 |                 |                                |                         |                            |                         |                                |                                   |                           | x                         |                            |

\* FRISC = Fragmin during Instability in Coronary Artery Disease; RISC = Research Group on Instability in Coronary Disease.
