# Supplementary material
Source: HighWire-hosted journal article supplement (https://www.annals.org/content/suppl/2007/02/01/146.3.211)
Supplement: Segal_A2_146-3-211-DC1-A2.pdf [file Segal_A2_146-3-211-DC1-A2.pdf]

**Appendix Table 2. Designs of the Modeled Analyses of the Costs of Using Low-Molecular-Weight Heparin Compared with Unfractionated Heparin for Treatment of Venous Thromboembolism\***

| Study, Year (Reference)         | Aims                                                                                                                                       | Design | Perspective and Time Horizon | Comparisons                                                                                                                                | Sources of Cost Estimates                                                                                               | Sources of Event Rate Estimates                                            | Units of Benefits                          |
|---------------------------------|--------------------------------------------------------------------------------------------------------------------------------------------|--------|------------------------------|--------------------------------------------------------------------------------------------------------------------------------------------|-------------------------------------------------------------------------------------------------------------------------|----------------------------------------------------------------------------|--------------------------------------------|
| Hull et al., 1997 (115)         | To perform an economic evaluation comparing tinzaparin to UFH for inpatient treatment of proximal DVT                                      | CE     | Third-party payer; 3 mo      | Inpatient tinzaparin therapy (175 U/kg daily)<br>Inpatient UFH                                                                             | Direct medical costs in patients enrolled (1992 Canadian and U.S. dollars)                                              | Observed in trial                                                          | Deaths averted, recurrences averted        |
| Rodger et al., 1998 (118)       | To assess the cost-effectiveness of LMWH and unfractionated heparin using data from a meta-analysis and patient-specific case-costing data | CE     | Third-party payer; 3 mo      | Outpatient LMWH if eligible; inpatient LMWH if not<br>Outpatient LMWH if eligible; inpatient UFH if not<br>Inpatient LMWH<br>Inpatient UFH | Case-costing using an online resource utilization-based patient-specific cost accounting system (1995 Canadian dollars) | Systematic literature review                                               | Deaths averted                             |
| Gould et al., 1999 (14)         | To evaluate the costs and health effects of LMWH compared with unfractionated heparin for inpatient treatment of acute DVT                 | CE     | Societal; death or age 99 y  | Inpatient enoxaparin (1 mg/kg twice daily)<br>Inpatient UFH (includes secondary analyses of outpatient enoxaparin)                         | Medicare reimbursement rates, therapy costs, wholesale prices (1997 U.S. dollars); analysis included 3%/y discounting   | From the literature, also used U.S. lifetable to construct survival curves | Quality-adjusted and unadjusted life-years |
| Estrada et al., 2000 (112)      | To evaluate the overall inpatient cost of treating acute VTE with enoxaparin versus unfractionated heparin                                 | CE     | Third-party payer; 3 mo      | Outpatient LMWH if eligible, inpatient LMWH if not<br>Outpatient LMWH if eligible, inpatient UFH if not<br>Inpatient UFH                   | Direct medical costs taken from literature review, institutional accounting, and costs to Medicare (1996 U.S. dollars)  | Literature                                                                 | Deaths averted, recurrences averted        |
| Lloyd et al., 1997 (116)        | To evaluate the inpatient cost of treating DVT with nadroparin compared with UFH                                                           | CM     | Third-party payer; 5 d       | Inpatient nadroparin (weight-based, twice daily)<br>Inpatient UFH (2 routes: SC or IV)                                                     | Direct costs measured as hospital charges to payer (Swiss sickness fund), list prices of drugs                          | Assumed equivalent in all arms                                             | U.S. dollars                               |
| van den Belt et al., 1998 (114) | To assess the cost consequences of outpatient management in the treatment of DVT                                                           | CM     | Third-party payer; 6 mo      | Outpatient fraxaparine (weight-adjusted)<br>Inpatient UFH                                                                                  | Direct medical costs measured in 1 site of multi-center clinical trial (1993 Dutch guilders)                            | Rates observed in all trial sites, considered equivalent in both groups    | Guilders                                   |

Appendix Table 2—Continued

| Study, Year (Reference)       | Aims                                                                                                                                        | Design         | Perspective and Time Horizon                                                                | Comparisons                                                                      | Sources of Cost Estimates                                                                                    | Sources of Event Rate Estimates                                                         | Units of Benefits                                               |
|-------------------------------|---------------------------------------------------------------------------------------------------------------------------------------------|----------------|---------------------------------------------------------------------------------------------|----------------------------------------------------------------------------------|--------------------------------------------------------------------------------------------------------------|-----------------------------------------------------------------------------------------|-----------------------------------------------------------------|
| O'Brien et al., 1999 (117)    | To evaluate the costs of treating a patient with proximal DVT with outpatient enoxaparin versus unfractionated heparin as inpatient therapy | CM             | Societal; 3 mo                                                                              | Outpatient enoxaparin (1 mg/kg twice daily)<br>Inpatient UFH                     | Canadian national data systems, local labor and therapy costs (1997 Canadian dollars)                        | Observed in trial, measured health-related quality of life                              | Canadian dollars (also reported health-related quality of life) |
| DeLissovoy et al., 2000 (109) | To perform an economic evaluation comparing LMWH with unfractionated heparin for treating a DVT in inpatients and outpatients               | CM             | Third-party payer; 3 mo                                                                     | Inpatient enoxaparin (1.5 mg/kg daily or 1.0 mg/kg twice daily)<br>Inpatient UFH | Direct medical costs from 33 U.S. sites participating in multicenter trial (1997 U.S. dollars)               | Observed in the 33 U.S. trial sites                                                     | U.S. dollars                                                    |
| Tillman et al., 2000 (119)    | To evaluate the clinical and economic outcomes associated with implementation of outpatient DVT treatment with LMWH                         | Decision model | Third-party payer; 3 mo                                                                     | Outpatient enoxaparin (1 mg/kg twice daily)<br>Inpatient UFH                     | Direct medical cost measured in outpatients in HMO; source of inpatient costs is unclear (1998 U.S. dollars) | Measured in outpatients                                                                 | U.S. dollars                                                    |
| Boucher et al., 2003 (121)    | To compare the cost of contemporary outpatient and historical inpatient management of proximal lower-limb DVT                               | CM             | Hospital; 7 days                                                                            | Outpatient tinzaparin or dalteparin<br>Inpatient UFH                             | Direct hospital costs measured in 1 hospital (2000 Canadian dollars)                                         | Assumed equivalent in both arms                                                         | Canadian dollars                                                |
| Caro et al., 2002 (122)       | To evaluate economic and health implications of tinzaparin versus UFH in treatment of DVT                                                   | CE             | Third-party payer; 3 mo and 50 y                                                            | Outpatient tinzaparin once daily<br>Inpatient UFH                                | Direct medical costs from administrative data, fee schedules, survey data, literature (1999 U.S. dollars)    | Event rates from the literature and patient-level data from Massachusetts               | Quality-adjusted life-years                                     |
| Avritscher et al., 2004 (120) | To determine whether the use of dalteparin or UFH is less expensive for inpatient management of patients with cancer who have DVT           | CM             | Provider (hospital), time horizon not specified; presumed to be duration of hospitalization | Inpatient dalteparin, once daily<br>Inpatient UFH                                | Two retrospective cohorts of patients in 1 institution, included a process flow analysis (2003 U.S. dollars) | Two retrospective cohorts of patients in 1 institution; assumed equivalent in both arms | U.S. dollars                                                    |
| Aujesky et al., 2005 (110)    | To compare medical and economic outcomes for PE treatment with LMWH or UFH                                                                  | CE             | Societal; 6 mo                                                                              | Inpatient enoxaparin (1 mg/kg twice daily for 6 d)<br>Inpatient IV UFH           | Direct medical costs from literature, Medicare reimbursement data (2002 U.S. dollars)                        | Literature (meta-analysis)                                                              | Quality-adjusted life-years                                     |

Continued on following page

Appendix Table 2—Continued

| Study, Year (Reference)        | Aims                                                                                                                 | Design | Perspective and Time Horizon | Comparisons                                                                                                                                           | Sources of Cost Estimates                         | Sources of Event Rate Estimates | Units of Benefits                                                      |
|--------------------------------|----------------------------------------------------------------------------------------------------------------------|--------|------------------------------|-------------------------------------------------------------------------------------------------------------------------------------------------------|---------------------------------------------------|---------------------------------|------------------------------------------------------------------------|
| Gómez-Outes et al., 2006 (111) | To compare costs and cost-effectiveness of 2 regimens with LMWH to UFH and oral anticoagulation for treatment of DVT | CE     | Payer; 3 mo                  | Inpatient bemiparin (115 U/d) and oral anticoagulant<br>Inpatient bemiparin (115 U/d) and long-term bemiparin<br>Inpatient UFH and oral anticoagulant | Published medical resource cost data (2002 euros) | Clinical trial by authors       | Quality-adjusted life-years, also reported cost per recurrence avoided |

\* CE = cost-effectiveness; CM = cost minimization; DVT = deep venous thrombosis; HMO = health maintenance organization; IV = intravenous; LMWH = low-molecular-weight heparin; PE = pulmonary embolism; SC = subcutaneous; UFH = unfractionated heparin; VTE = venous thromboembolism.
