# Supplementary material
Source: HighWire-hosted journal article supplement (https://www.annals.org/content/suppl/2007/02/01/146.3.211)
Supplement: Segal_A3_146-3-211-DC1-A3.pdf [file Segal_A3_146-3-211-DC1-A3.pdf]

**Appendix Table 3. Results of the Modeled Analyses of the Costs of Using Low-Molecular-Weight Heparin Compared with Unfractionated Heparin for Treatment of Venous Thromboembolism\***

| Study, Year (Reference)         | Least Costly Strategy                                 | Strategy with Greatest Benefits                                                                                                  | Incremental Cost-Effectiveness                                                                                       | Cost Savings                                                                                                                                                                     | Sensitivity Analysis                                                                                                                                                       | Comments                                                                                                           |
|---------------------------------|-------------------------------------------------------|----------------------------------------------------------------------------------------------------------------------------------|----------------------------------------------------------------------------------------------------------------------|----------------------------------------------------------------------------------------------------------------------------------------------------------------------------------|----------------------------------------------------------------------------------------------------------------------------------------------------------------------------|--------------------------------------------------------------------------------------------------------------------|
| Hull et al., 1997 (115)         | Inpatient tinzaparin                                  | Inpatient tinzaparin                                                                                                             | Tinzaparin dominates                                                                                                 | \$401 per person with tinzaparin, (11% savings)                                                                                                                                  | Robust to all 1-way analyses; when cost of tinzaparin is 5.8 times base cost it is not cost-saving                                                                         | If 37% of patients are treated as outpatients, cost saving of \$913 per person                                     |
| Rodger et al., 1998 (118)       | Outpatient LMWH if eligible and inpatient LMWH if not | Either LMWH inpatient or outpatient LMWH if eligible and inpatient LMWH if not                                                   | LMWH dominates whether outpatient or inpatient                                                                       | \$767 per person with LMWH outpatient/inpatient relative to UFH (23% savings)                                                                                                    | Using "worst-case" estimates, cost-effectiveness of inpatient LMWH relative to inpatient UFH is \$25 667 per life saved at 3 mo                                            | If one assumes equivalent efficacy and safety in all arms, LMWH is cheaper to deliver in any setting and dominates |
| Gould et al., 1999 (14)         | Inpatient UFH                                         | Inpatient enoxaparin                                                                                                             | \$6910 per LY or \$7820 per QALY with enoxaparin                                                                     | Cost-saving when 8% of enoxaparin-treated patients are outpatients, or when 13% have an early discharge; sensitive to frequency of late complications, robust to other variables | Robustly cost-effective; becomes cost-saving if LMWH-treated patients are outpatients                                                                                      |                                                                                                                    |
| Estrada et al., 2000 (112)      | Outpatient LMWH and inpatient UFH                     | Outpatient and inpatient LMWH                                                                                                    | \$9600 per recurrence averted; \$80 000 per death averted with outpatient/inpatient LMWH relative to LMWH outpatient | \$310 per person for LMWH outpatient and inpatient relative to UFH (10% savings)                                                                                                 | Sensitive to the percentage of patients eligible for outpatient therapy; if fewer than 14%, UFH lower cost than LMWH outpatient/inpatient; model sensitive to costs of UFH | Lower costs primarily due to saving hospitalization costs                                                          |
| Lloyd et al., 1997 (116)        | Inpatient nadroparin                                  | Assumed to be equivalent for model                                                                                               | NA                                                                                                                   | \$153 per person with nadroparin (57% savings)                                                                                                                                   | Robust to all 1-way analyses; cost-savings less if nadroparin-treated patients are required to have APTT measurement                                                       |                                                                                                                    |
| van den Belt et al., 1998 (114) | Outpatient fraxaparine                                | Assumed to be equivalent for model                                                                                               | NA                                                                                                                   | 5528 Dutch guilders per person with fraxaparine (64% savings)                                                                                                                    | Fraxaparine is cost-saving even if 50% of patients require home care visits; cost-saving even if 50% require inpatient care                                                |                                                                                                                    |
| O'Brien et al., 1999 (117)      | Outpatient enoxaparin                                 | Higher social functioning on SF-36 with enoxaparin, otherwise no difference in health-related quality-of-life measures or events | NA                                                                                                                   | \$3045 per person with enoxaparin (57% savings)                                                                                                                                  | Robust to all 1-way analyses                                                                                                                                               |                                                                                                                    |
| DeLissovoy et al., 2000 (109)   | Not stated                                            | Inpatient enoxaparin twice daily; fewest readmissions for recurrent DVT and for all causes                                       | NA                                                                                                                   | None                                                                                                                                                                             | Robust to all 1-way analyses                                                                                                                                               | Blood testing and costs of medication offset by fewer readmissions with enoxaparin                                 |
| Tillman et al., 2000 (119)      | Outpatient enoxaparin                                 | Unknown                                                                                                                          | NA                                                                                                                   | \$2828 per person with enoxaparin (60% savings)                                                                                                                                  | Enoxaparin not cost-saving if drug cost increases 750% or hospitalization costs drop 77%                                                                                   | Rates of events in the UFH arm not explicitly stated                                                               |
| Boucher et al., 2003 (121)      | Outpatient LMWH                                       | Assumed to be equivalent for model                                                                                               | NA                                                                                                                   | \$1578 Canadian per person with outpatient treatment (91% savings)                                                                                                               | "Worst-case scenario," 87% savings with outpatient treatment                                                                                                               | Acknowledges that some of the savings is shifted to patients who must purchase LMWH                                |

*Continued on following page*

Appendix Table 3—Continued

| Study, Year (Reference)        | Least Costly Strategy                             | Strategy with Greatest Benefits                   | Incremental Cost-Effectiveness               | Cost Savings                                                                                                                        | Sensitivity Analysis                                                                                                                                                                                                | Comments                                                                                                                                                   |
|--------------------------------|---------------------------------------------------|---------------------------------------------------|----------------------------------------------|-------------------------------------------------------------------------------------------------------------------------------------|---------------------------------------------------------------------------------------------------------------------------------------------------------------------------------------------------------------------|------------------------------------------------------------------------------------------------------------------------------------------------------------|
| Caro et al., 2002 (122)        | Outpatient tinzaparin                             | Outpatient tinzaparin                             | Tinzaparin dominates                         | \$5016 per person with outpatient treatment (49% savings); short-term costs only<br>\$4890 (34% with inclusion of subsequent costs) | Tinzaparin is cost-saving even if all patients are treated as inpatients, or if price is increase up to 2.8 times; robust to varying management costs, discount rate, and event rates up to a 55% increase in rates | Suggests that strong results favoring tinzaparin are due to tinzaparin's superior efficacy relative to that of other LMWHs, although based on only 1 trial |
| Avritscher et al., 2004 (120)  | Dalteparin                                        | Assumed to be equivalent for model                | NA                                           | \$1569 per person with dalteparin (32% savings)                                                                                     | Robust in all 1-way analyses; costs of dalteparin would need to increase 5-fold to match costs of UFH                                                                                                               | Savings from shorter hospital stays, lower laboratory costs, less intensive monitoring, some cost-shifting after discharge                                 |
| Aujesky et al., 2005 (110)     | Inpatient UFH                                     | Inpatient LMWH                                    | \$1209 per QALY favoring LMWH                | None                                                                                                                                | Robust to all 1-way analyses, cost-saving if LMWH costs <\$51 daily; cost-saving if 8% of LMWH are discharged early                                                                                                 |                                                                                                                                                            |
| Gómez-Outes et al., 2006 (111) | Inpatient bemparin followed by long-term bemparin | Inpatient bemparin followed by oral anticoagulant | Both bemparin arms dominate over the UFH arm | \$769 A vs. C (19% savings)<br>\$908 B vs. C (22% savings)†                                                                         | Robust in all 1-way analyses, most sensitive to rate of recurrence                                                                                                                                                  | Savings mostly due to lower hospital-stay costs                                                                                                            |

\* APTT = activated partial thromboplastin time; DVT = deep venous thrombosis; LMWH = low-molecular-weight heparin; LY = life-year; NA = not available; QALY = quality-adjusted life-year; SF-36 = Short Form-36 Health Survey; UFH = unfractionated heparin.

† A = inpatient bemparin (115 U/d) and oral anticoagulant; B = inpatient bemparin (115 U/d) and long-term bemparin; C = inpatient UFH and oral anticoagulant.
